# Supplementary material
Source: PubMed Central journal article supplement (PMC7315565)
Supplement: ao0c01018_si_001.pdf [file ao0c01018_si_001.pdf]

## Photothermal Response of Polyhydroxy Fullerenes

*Alan Chen<sup>†</sup>, Stephen R. Grobmyer<sup>‡,§</sup> and Vijay B. Krishna<sup>\*,†</sup>*

*<sup>†</sup>Department of Biomedical Engineering, Lerner Research Institute, <sup>‡</sup>Surgical Oncology, Digestive Disease  
Institute, Cleveland Clinic, Cleveland, OH 44195*

\*Corresponding Author: Vijay Krishna ([krishnv2@ccf.org](mailto:krishnv2@ccf.org))

<sup>§</sup>Current Address: Oncology Institute, Cleveland Clinic Abu Dhabi, Abu Dhabi, United Arab Emirates

## Supplementary Figures

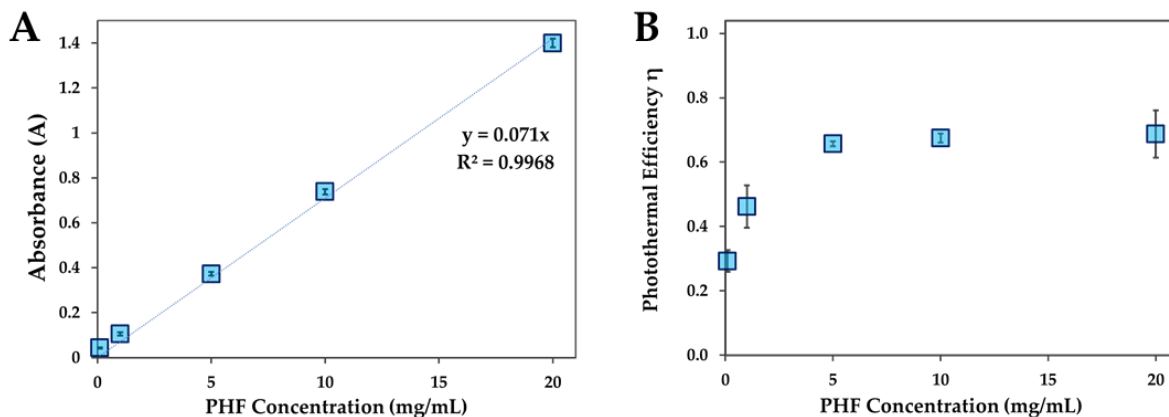

**Figure S1: A)** Ground state absorption of PHF as a function of concentration at 785 nm. PHF has linear absorption in tested concentrations. PHF's extinction coefficient at 785 nm is 0.071 mL/(mg cm). **B)** Photothermal conversion efficiency as a function of PHF concentration. The photothermal efficiency increases linearly at low concentrations and plateaus at higher concentrations. All experiments were conducted in triplicate (n=3) and error bars represent standard deviations.

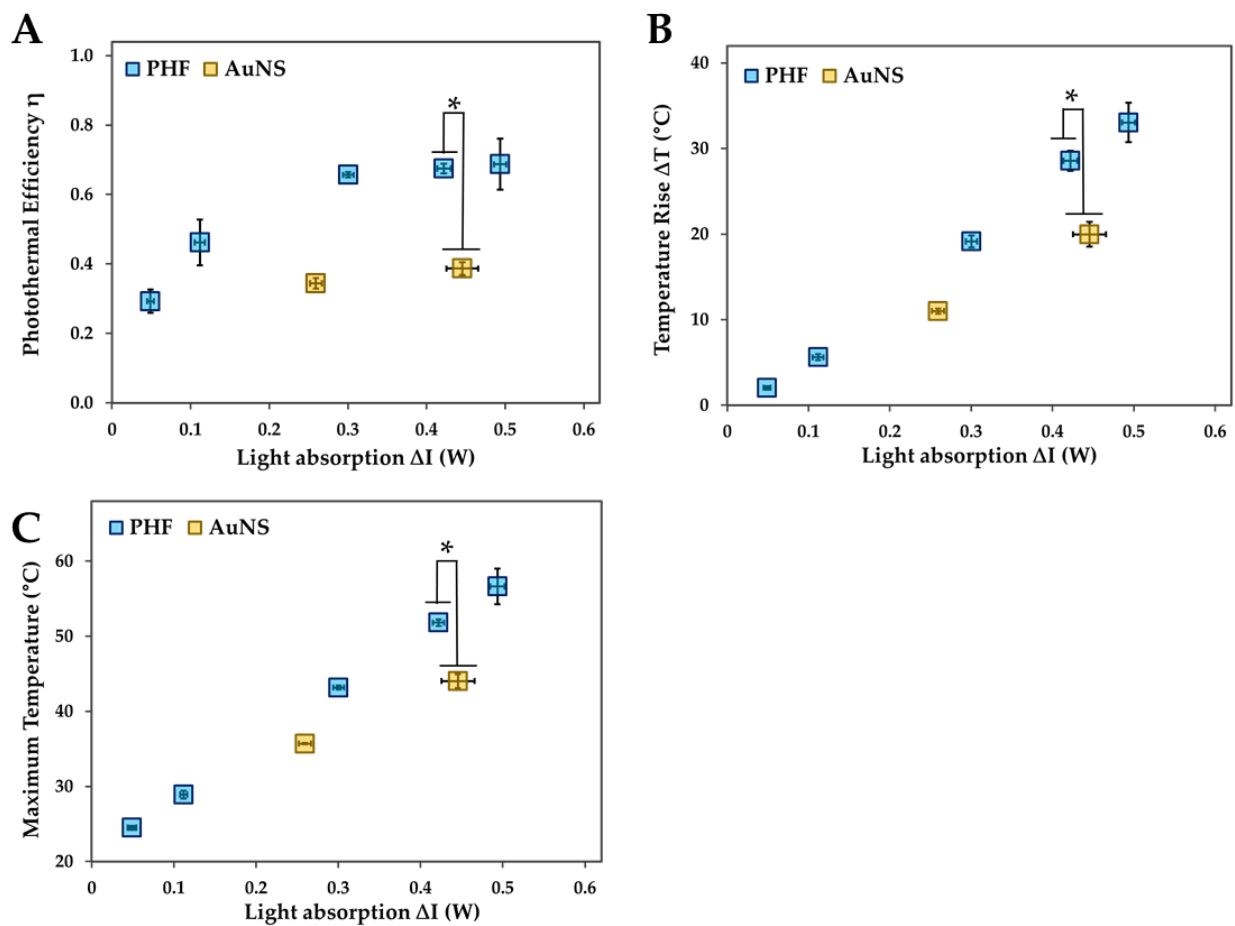

**Figure S2:** Effect of light absorption ( $\Delta I$ ) on **A**) photothermal efficiency ( $\eta$ ), **B**) temperature rise ( $\Delta T$ ) and **C**) maximum temperature. At similar light absorptions, PHF has significantly ( $p > 0.01$ ) higher photothermal efficiency than gold nanoshells (AuNS). All experiments were conducted in triplicate ( $n=3$ ) and error bars represent standard deviations. \* indicates significance at  $\alpha=0.01$ .

**Table S1**

| Photothermal Agent | Laser Wavelength | Cuvette material | $t$ (sec)        | $I_0$ (W/cm <sup>2</sup> ) | Conc of NPs         | Converted Conc. (mg/mL) | $\eta$ Calculation Method | $\eta$ (%) | References |
|--------------------|------------------|------------------|------------------|----------------------------|---------------------|-------------------------|---------------------------|------------|------------|
| PHF                | 783 nm           | PMMA             | 1800 (plateau)   | 0.5                        | 10 mg/mL            | 10                      | optimization              | 69         | This work  |
| AuNS               | 784 nm           | PMMA             | 1800 (plateau)   | 0.5                        | 31.2 $\mu$ g/mL     | 0.0312                  | optimization              | 39         | This work  |
| AuNS               | 815 nm           | PMMA             | 2400 (plateau)   | 1.50                       | 3 pM                | 0.0312                  | time constant             | 30         | 1          |
| AuNR (8 nm)        | 809 nm           | Quartz           | 1800 (plateau)   | 1.72                       | 0.24 nM             | 0.57                    | time constant             | 95         | 2          |
| AuNR (20 nm)       | 809 nm           | Quartz           | 1800 (plateau)   | 1.72                       | 0.24 nM             | 0.57                    | time constant             | 90         | 2          |
| AuNR (27 nm)       | 980nm            | Quartz           | 600 (plateau)    | 0.51                       | 40 $\mu$ g/mL       | 0.04                    | time constant             | 23.7       | 3          |
| AuNR (30 nm)       | 980 nm           | Quartz           | 360 (plateau)    | 1                          | 50 $\mu$ g/mL       | 0.05                    | time constant             | 78.8       | 4          |
| AuNR (36 nm)       | 809 nm           | Quartz           | 1800 (plateau)   | 1.72                       | 30 $\mu$ g/mL       | 0.03                    | time constant             | 95         | 5          |
| AuNR (40 nm)       | 808 nm           | Quartz           | 300 (no plateau) | 0.1                        | <i>Not provided</i> |                         | time constant             | 27-33      | 6          |
| AuNR (45 nm)       | 815 nm           | PMMA             | 3600 (plateau)   | 1.50                       | 100 pM              | 0.24                    | time constant             | 55         | 1          |
| AuNR (50 nm)       | 809 nm           | Quartz           | 1800 (plateau)   | 1.72                       | 0.24 nM             | 0.57                    | time constant             | 50         | 2          |
| AuNR (60 nm)       | 809 nm           | Quartz           | 1800 (plateau)   | 1.72                       | 30 $\mu$ g/mL       | 0.03                    | time constant             | 89         | 5          |
| AuNR (60 nm)       | 808 nm           |                  | 600 (no plateau) | 0.6                        | 25 $\mu$ g/mL       | 0.025                   | time constant             | 39         | 7          |
| AuNR (60 nm)       | 808 nm           | PP               | 300 (plateau)    | 0.2                        | 100 $\mu$ g/mL      | 0.1                     | time constant             | 36.2       | 8          |
| AuNR (70 nm)       | 809 nm           | Quartz           | 1800 (plateau)   | 1.72                       | 30 $\mu$ g/mL       | 0.03                    | time constant             | 82         | 5          |
| AuNP (5 nm)        | 532 nm           | Quartz           | 1200 (plateau)   | 0.25                       | 0.2 mM              |                         | time constant             | 80         | 9          |
| AuNP (10 nm)       | 808 nm           | Quartz           | 300 (no plateau) | 0.1                        | <i>Not provided</i> |                         | time constant             | 9          | 6          |

|                        |        |        |                   |      |                     |       |               |      |    |
|------------------------|--------|--------|-------------------|------|---------------------|-------|---------------|------|----|
| AuNP (15 nm)           | 532 nm | Quartz | 1200 (plateau)    | 0.25 | 0.2 mM              |       | time constant | 78   | 9  |
| AuNP (20 nm)           | 514 nm | Quartz | 320 (plateau)     | 0.17 | 920 µg/mL           | 0.92  | time constant | 8    | 10 |
| AuNP (50 nm)           | 532 nm | Quartz | 1200 (plateau)    | 0.25 | 0.2 mM              |       | time constant | 65   | 9  |
| AuNP (127 nm)          | 809 nm | Quartz | 1800 (plateau)    | 1.72 | 33 µg/mL            | 0.033 | time constant | 60   | 5  |
| AuNP (154 nm)          | 809 nm | Quartz | 1800 (plateau)    | 1.72 | 33 µg/mL            | 0.033 | time constant | 45   | 5  |
| Au Nano Cube (10 nm)   | 808 nm | Quartz | 300 (no plateau)  | 0.1  | <i>Not provided</i> |       | time constant | 15   | 6  |
| AuNR-CuS (60 nm)       | 808 nm |        | 600 (no plateau)  | 0.6  | 25 µg/mL            | 0.025 | time constant | 62   | 7  |
| AuNP-Co (50 nm)        | 790 nm |        | 1800 (plateau)    | 1.0  | 0.2 mg/mL           | 0.2   | time constant | 99   | 11 |
| Au/Mo-ICG (110 nm)     | 808 nm | PP     | 300 (plateau)     | 0.2  | 100 µg/mL           | 0.1   | time constant | 68.8 | 8  |
| Au-Pt Nanoraspberries  | 650 nm | Quartz | 300 (no plateau)  | 0.1  | <i>Not provided</i> |       | time constant | 61   | 12 |
| Au-Pt Nanoraspberries  | 808 nm | Quartz | 300 (no plateau)  | 0.1  | <i>Not provided</i> |       | time constant | 52   | 12 |
| AgI-AgS2 Nanostructure | 808 nm | Quartz | 3000 (no plateau) | 0.42 | 0.01% wt            | 10    | time constant | 33.4 | 13 |
| NiS2, Mesoporous       | 808 nm | Quartz | 600 (no plateau)  | 2    | 20 µg/mL            | 0.02  | time constant | 44.6 | 14 |
| Liquid Metal NR        | 808 nm | PS     | 250 (no plateau)  | 3.5  | 800 mg/L            | 0.8   | time constant | 25.3 | 15 |
| GaNS                   | 808 nm | PS     | 250 (no plateau)  | 3.5  | 800 mg/L            | 0.8   | time constant | 25.3 | 15 |
| GaNR                   | 808 nm | PS     | 250 (no plateau)  | 3.5  | 800 mg/L            | 0.8   | time constant | 32.7 | 15 |
| Cu Nanocluster         | 980 nm | Quartz | 600 (plateau)     | 0.51 | 40 µg/mL            | 0.04  | time constant | 25.7 | 3  |
| Cu Nanocluster         | 800 nm | Quartz | 300 (no plateau)  | 2    | 1 mg/mL             | 1     | time constant | 22   | 16 |

|                          |        |        |                  |     |                      |       |               |      |    |
|--------------------------|--------|--------|------------------|-----|----------------------|-------|---------------|------|----|
| Pt Nanoparticles (2 nm)  | 808 nm | Quartz | 300 (no plateau) | 0.1 |                      |       | time constant | 33   | 17 |
| Pt Nanoparticles (80 nm) | 808 nm | Quartz | 300 (no plateau) | 0.1 |                      |       | time constant | 15   | 17 |
| ICG                      | 808 nm | PS     | 180 (no plateau) | 1.1 | 5 $\mu\text{g/mL}$   | 0.005 | time constant | 3.37 | 18 |
| Cyanine Micelles         | 808 nm |        | 600 (no plateau) | 0.7 | 5 $\mu\text{g/mL}$   | 0.005 |               | 47   | 19 |
| Organic Drug             | 635 nm |        | 300 (no plateau) | 0.5 | 0.5 mM               |       | time constant | 37   | 20 |
| Carbon Nanospheres       | 808 nm | PS     | 600 (no plateau) | 1.5 | 100 $\mu\text{g/mL}$ | 0.1   | time constant | 35.7 | 21 |

$t$  = Laser irradiation time;  $I_0$  = Incident laser power;  $\eta$  = Photothermal conversion efficiency

## References

1. Cole, J. R.; Mirin, N. A.; Knight, M. W.; Goodrich, G. P.; Halas, N. J., Photothermal Efficiencies of Nanoshells and Nanorods for Clinical Therapeutic Applications. *J. Phys. Chem. C* **2009**, *113* (28), 12090-12094.
2. Chen, H.; Shao, L.; Ming, T.; Sun, Z.; Zhao, C.; Yang, B.; Wang, J., Understanding the photothermal conversion efficiency of gold nanocrystals. *Small* **2010**, *6* (20), 2272-80.
3. Tian, Q.; Jiang, F.; Zou, R.; Liu, Q.; Chen, Z.; Zhu, M.; Yang, S.; Wang, J.; Wang, J.; Hu, J., Hydrophilic Cu<sub>9</sub>S<sub>5</sub> Nanocrystals: A Photothermal Agent with a 25.7% Heat Conversion Efficiency for Photothermal Ablation of Cancer Cells in Vivo. *ACS Nano* **2011**, *5* (12), 9761-9771.
4. Bi, C.; Chen, J.; Chen, Y.; Song, Y.; Li, A.; Li, S.; Mao, Z.; Gao, C.; Wang, D.; Möhwald, H.; Xia, H., Realizing a Record Photothermal Conversion Efficiency of Spiky Gold Nanoparticles in the Second Near-Infrared Window by Structure-Based Rational Design. *Chem. Mater.* **2018**, *30* (8), 2709-2718.
5. Jiang, K.; Smith, D. A.; Pinchuk, A., Size-Dependent Photothermal Conversion Efficiencies of Plasmonically Heated Gold Nanoparticles. *J. Phys. Chem. C* **2013**, *117* (51), 27073-27080.
6. Depciuch, J.; Stec, M.; Kandler, M.; Baran, J.; Parlinska-Wojtan, M., From spherical to bone-shaped gold nanoparticles-Time factor in the formation of Au NPs, their optical and photothermal properties. *Photodiagn. Photodyn. Ther.* **2020**, 101670.
7. Leng, C.; Zhang, X.; Xu, F.; Yuan, Y.; Pei, H.; Sun, Z.; Li, L.; Bao, Z., Engineering Gold Nanorod-Copper Sulfide Heterostructures with Enhanced Photothermal Conversion Efficiency and Photostability. *Small* **2018**, *14* (12), e1703077.
8. Younis, M. R.; Wang, C.; An, R.; Wang, S.; Younis, M. A.; Li, Z.-Q.; Wang, Y.; Ihsan, A.; Ye, D.; Xia, X.-H., Low Power Single Laser Activated Synergistic Cancer Phototherapy Using Photosensitizer Functionalized Dual Plasmonic Photothermal Nanoagents. *ACS Nano* **2019**, *13* (2), 2544-2557.
9. Jiang, R.; Cheng, S.; Shao, L.; Ruan, Q.; Wang, J., Mass-Based Photothermal Comparison Among Gold Nanocrystals, PbS Nanocrystals, Organic Dyes, and Carbon Black. *J. Phys. Chem. C* **2013**, *117* (17), 8909-8915.
10. Roper, D. K.; Ahn, W.; Hoepfner, M., Microscale Heat Transfer Transduced by Surface Plasmon Resonant Gold Nanoparticles. *J. Phys. Chem. C* **2007**, *111* (9), 3636-3641.
11. Lindley, S. A.; Zhang, J. Z., Bumpy Hollow Gold Nanospheres for Theranostic Applications: Effect of Surface Morphology on Photothermal Conversion Efficiency. *ACS Appl. Nano Mater.* **2019**, *2* (2), 1072-1081.
12. Depciuch, J.; Stec, M.; Klebowski, B.; Baran, J.; Parlinska-Wojtan, M., Platinum-gold nanoraspberries as effective photosensitizer in anticancer photothermal therapy. *J. Nanobiotechnol.* **2019**, *17* (1), 107.
13. Zeng, W.; Suo, L.; Zhang, C.; Wu, D.; Zhu, H., AgI-Ag<sub>2</sub>S heterostructures for photothermal conversion and solar energy harvesting. *J. Taiwan Inst. Chem. Eng.* **2019**, *95*, 273-280.

14. He, G.; Ma, Y.; Zhou, H.; Sun, S.; Wang, X.; Qian, H.; Xu, Y.; Miao, Z.; Zha, Z., Mesoporous NiS<sub>2</sub> nanospheres as a hydrophobic anticancer drug delivery vehicle for synergistic photothermal–chemotherapy. *J. Mater. Chem. B* **2019**, *7* (1), 143-149.
15. Sun, X.; Sun, M.; Liu, M.; Yuan, B.; Gao, W.; Rao, W.; Liu, J., Shape tunable gallium nanorods mediated tumor enhanced ablation through near-infrared photothermal therapy. *Nanoscale* **2019**, *11* (6), 2655-2667.
16. Hessel, C. M.; Pattani, V. P.; Rasch, M.; Panthani, M. G.; Koo, B.; Tunnell, J. W.; Korgel, B. A., Copper Selenide Nanocrystals for Photothermal Therapy. *Nano Lett.* **2011**, *11* (6), 2560-2566.
17. Depciuch, J.; Stec, M.; Klebowski, B.; Maximenko, A.; Drzymala, E.; Baran, J.; Parlinska-Wojtan, M., Size effect of platinum nanoparticles in simulated anticancer photothermal therapy. *Photodiagn. Photodyn. Ther.* **2020**, *29*, 101594.
18. Yoon, H.-J.; Lee, H.-S.; Lim, J.-Y.; Park, J.-H., Liposomal Indocyanine Green for Enhanced Photothermal Therapy. *ACS Appl. Mater. Interfaces* **2017**, *9* (7), 5683-5691.
19. Li, L.; Yang, Q.; Shi, L.; Zheng, N.; Li, Z.; Li, K.; Qiao, S.; Jia, T.; Sun, T.; Wang, Y., Novel phthalocyanine-based polymeric micelles with high near-infrared photothermal conversion efficiency under 808 nm laser irradiation for in vivo cancer therapy. *J. Mater. Chem. B* **2019**, *7* (14), 2247-2251.
20. Wang, H.; Chang, J.; Shi, M.; Pan, W.; Li, N.; Tang, B., A Dual-Targeted Organic Photothermal Agent for Enhanced Photothermal Therapy. *Angew. Chem., Int. Ed. Engl.* **2019**, *58* (4), 1057-1061.
21. Weng, Y.; Guan, S.; Wang, L.; Qu, X.; Zhou, S., Hollow carbon nanospheres derived from biomass by-product okara for imaging-guided photothermal therapy of cancers. *J. Mater. Chem. B* **2019**, *7* (11), 1920-1925.
